# Supplementary material
Source: PubMed Central journal article supplement (PMC4155504)
Supplement: NIHMS621927-supplement-Supporting_Information_Appendix_C.pdf [file NIHMS621927-supplement-Supporting_Information_Appendix_C.pdf]

University of Central Florida  
 Student Perception of Instruction

Year/Term: 2012/Summer  
 Semester: 1450

Instructor Name: Sean Moore

|                                                          |                              |                               |
|----------------------------------------------------------|------------------------------|-------------------------------|
| Molecular Biology & Micro/Burnett College Biomedical Sci | MCB4920CC001                 | GROUP-EFFORT APPLIED RESEARCH |
| <b>Department/School</b>                                 | <b>Course-Section Number</b> | <b>Course Name</b>            |
| 13                                                       | 8                            | 61.54                         |
| <b>Number of Students Enrolled</b>                       | <b>Number Responding</b>     | <b>% of Response</b>          |

| Question                                  | Excellent | Very Good | Good | Fair | Poor | N | Mean   | Std Dev |
|-------------------------------------------|-----------|-----------|------|------|------|---|--------|---------|
| Description of course objectives          | 100.00    | 0.00      | 0.00 | 0.00 | 0.00 | 8 | 5.0000 | 0.0000  |
| Communication of Ideas and Info           | 100.00    | 0.00      | 0.00 | 0.00 | 0.00 | 8 | 5.0000 | 0.0000  |
| Expression of expectations of performance | 100.00    | 0.00      | 0.00 | 0.00 | 0.00 | 8 | 5.0000 | 0.0000  |
| Availability to assist students           | 100.00    | 0.00      | 0.00 | 0.00 | 0.00 | 8 | 5.0000 | 0.0000  |
| Respect and concern for students          | 100.00    | 0.00      | 0.00 | 0.00 | 0.00 | 8 | 5.0000 | 0.0000  |
| Stimulation of interest in the course     | 100.00    | 0.00      | 0.00 | 0.00 | 0.00 | 8 | 5.0000 | 0.0000  |
| Facilitation of learning                  | 100.00    | 0.00      | 0.00 | 0.00 | 0.00 | 8 | 5.0000 | 0.0000  |
| Overall assessment of instructor          | 100.00    | 0.00      | 0.00 | 0.00 | 0.00 | 8 | 5.0000 | 0.0000  |

Statistics over all questions

|         |     |
|---------|-----|
| N       | 64  |
| Mean    | 5.0 |
| Std Dev | 0.0 |
| Min     | 5   |
| Max     | 5   |

Response Coding: Excellent = 5    Very Good = 4    Good = 3    Fair = 2    Poor = 1

University of Central Florida's Student Perception of Instruction, Summer 2013 (1480)

Molecular Biology & Micro, College of Medicine

MCB4920C.C001 - GROUP-EFFORT APPLIED RESEARCH

Sean Moore

Number of Students Enrolled: 11

| Question                                                                            | % Excellent<br>5 | % Very Good<br>4 | % Good<br>3 | % Fair<br>2 | % Poor<br>1 | N  | Mean | Std Dev | Overall Dept Mean | Overall College Mean | Overall UCF Mean |
|-------------------------------------------------------------------------------------|------------------|------------------|-------------|-------------|-------------|----|------|---------|-------------------|----------------------|------------------|
| 1. Effectiveness organizing the course                                              | 100.00           | 0.00             | 0.00        | 0.00        | 0.00        | 10 | 5.00 | 0.0000  | 4.27              | 4.27                 | 4.24             |
| 2. Effectiveness explaining course requirements, grading criteria, and expectations | 60.00            | 20.00            | 10.00       | 0.00        | 10.00       | 10 | 4.20 | 1.2490  | 4.30              | 4.30                 | 4.23             |
| 3. Effectiveness communicating ideas and/or information                             | 90.00            | 10.00            | 0.00        | 0.00        | 0.00        | 10 | 4.90 | 0.3000  | 4.21              | 4.21                 | 4.19             |
| 4. Effectiveness showing respect and concern for students                           | 90.00            | 10.00            | 0.00        | 0.00        | 0.00        | 10 | 4.90 | 0.3000  | 4.39              | 4.39                 | 4.31             |
| 5. Effectiveness stimulating interest in the course                                 | 100.00           | 0.00             | 0.00        | 0.00        | 0.00        | 10 | 5.00 | 0.0000  | 4.28              | 4.28                 | 4.18             |
| 6. Effectiveness creating an environment that helps students learn                  | 100.00           | 0.00             | 0.00        | 0.00        | 0.00        | 10 | 5.00 | 0.0000  | 4.26              | 4.26                 | 4.19             |
| 7. Effectiveness giving useful feedback on course performance                       | 80.00            | 10.00            | 10.00       | 0.00        | 0.00        | 10 | 4.70 | 0.6403  | 4.22              | 4.22                 | 4.14             |
| 8. Effectiveness helping students achieve course objectives                         | 100.00           | 0.00             | 0.00        | 0.00        | 0.00        | 10 | 5.00 | 0.0000  | 4.25              | 4.25                 | 4.19             |
| 9. Overall effectiveness of the instructor                                          | 80.00            | 20.00            | 0.00        | 0.00        | 0.00        | 10 | 4.80 | 0.4000  | 4.26              | 4.26                 | 4.20             |

MCB 4920C Group Effort Applied Research (GEAR)  
 Student Evaluations of Graduate Teaching Assistant  
 7 responses for Fall 2012

| Question                                               | Avg. response |
|--------------------------------------------------------|---------------|
| Feedback concerning your performance in class          | 4.85          |
| Instructor's interest in your learning                 | 5             |
| Instructor's overall organization of the course        | 4.71          |
| Description of course objectives & assignments         | 4.85          |
| Communication of ideas & information                   | 4.85          |
| Availability to assist students in or outside of class | 5             |
| Respect & concern for students                         | 5             |
| Stimulation of interest in the course                  | 4.85          |
| Facilitation of learning                               | 5             |
| Overall assessment of instructor                       | 5             |

| What I liked most about the class:                                     | # responses |
|------------------------------------------------------------------------|-------------|
| Everything explained clearly                                           | 1           |
| GEAR showed me what research is like and I plan to continue after GEAR | 1           |
| Learned more than I did in any other class                             | 1           |
| Hands on experience                                                    | 2           |
| Interest of instructors in our learning                                | 1           |
| Being truly exposed to research                                        | 1           |
| Helen's ability to explain theoretical concepts & making them hands on | 1           |

| What I liked least about the class:                                        | # responses |
|----------------------------------------------------------------------------|-------------|
| Time of class                                                              | 1           |
| Grade structure/syllabus                                                   | 1           |
| Wish there was more time to complete project                               | 1           |
| Test questions were hard and you really had to know the subject thoroughly | 1           |
| Confusing at times, but after talking to professor, it became clear        | 1           |

| Your reaction to the method of evaluating your mastery of course: | # responses |
|-------------------------------------------------------------------|-------------|
| Accurate                                                          | 1           |
| Good                                                              | 1           |
| Appropriate to course style                                       | 2           |

| Additional comments & suggestions for improvement:         | # responses |
|------------------------------------------------------------|-------------|
| Wonderful teacher                                          | 2           |
| Learned so much information                                | 1           |
| Class was a great experience                               | 1           |
| Great introductory research course-wish I could take again | 1           |
